# Supplementary material for: Sodium alginate-nanocellulose-based active composite film for edible oils packaging applications
Source: Royal Society of Chemistry journal article supplement (doi:10.1039/d4ma00670d), 2024-01-01
Supplement: d4ma00670d1.pdf [file d4ma00670d1.pdf]

## Sodium Alginate-nanocellulose-based active Composite film for Edible Oils packaging applications

Sazzadur Rahman<sup>a</sup>, Chandramani Batsh<sup>a</sup>, Shalini Gurumayam<sup>b</sup>, Jagat Chandra Borah<sup>b</sup> and  
Devasish Chowdhury<sup>\*</sup>

<sup>a</sup> Material Nanochemistry Laboratory, Physical Sciences Division, Institute of Advanced Study  
in Science and Technology, Paschim Boragaon, Garchuk, Guwahati-781035, India. Fax: +91  
361 2279909; Tel: +91 361 2912073; E-mail: [devasish@iasst.gov.in](mailto:devasish@iasst.gov.in)

<sup>b</sup> Chemical Biology Lab1, Life Sciences Division, Institute of Advanced Study in Science and  
Technology, Paschim Boragaon, Garchuk, Guwahati-781035, India.

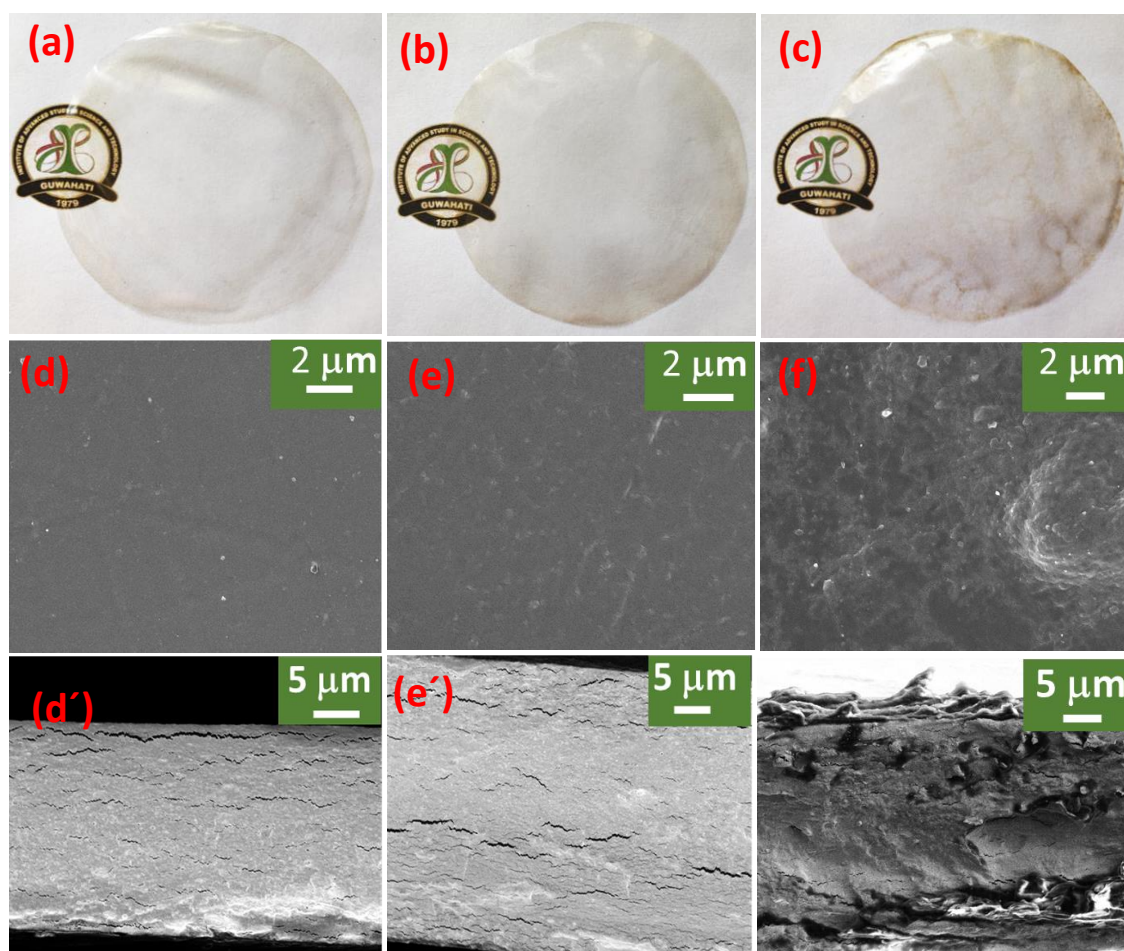

Figure S1. (a), (b), and (c) are the photograph of 0.12% CNF-SA, 1% CNF-SA, 4% CNF-SA film; (d-d'), (e-e'), and (f-f') are the SEM image of 0.12% CNF-SA, 1% CNF-SA, 4% CNF-SA film.
